# Supplementary material
Source: PubMed Central journal article supplement (PMC3178735)
Supplement: NIHMS316617-supplement-1.pdf [file NIHMS316617-supplement-1.pdf]

# Supplementary Figure 1 O'Sullivan et al.,

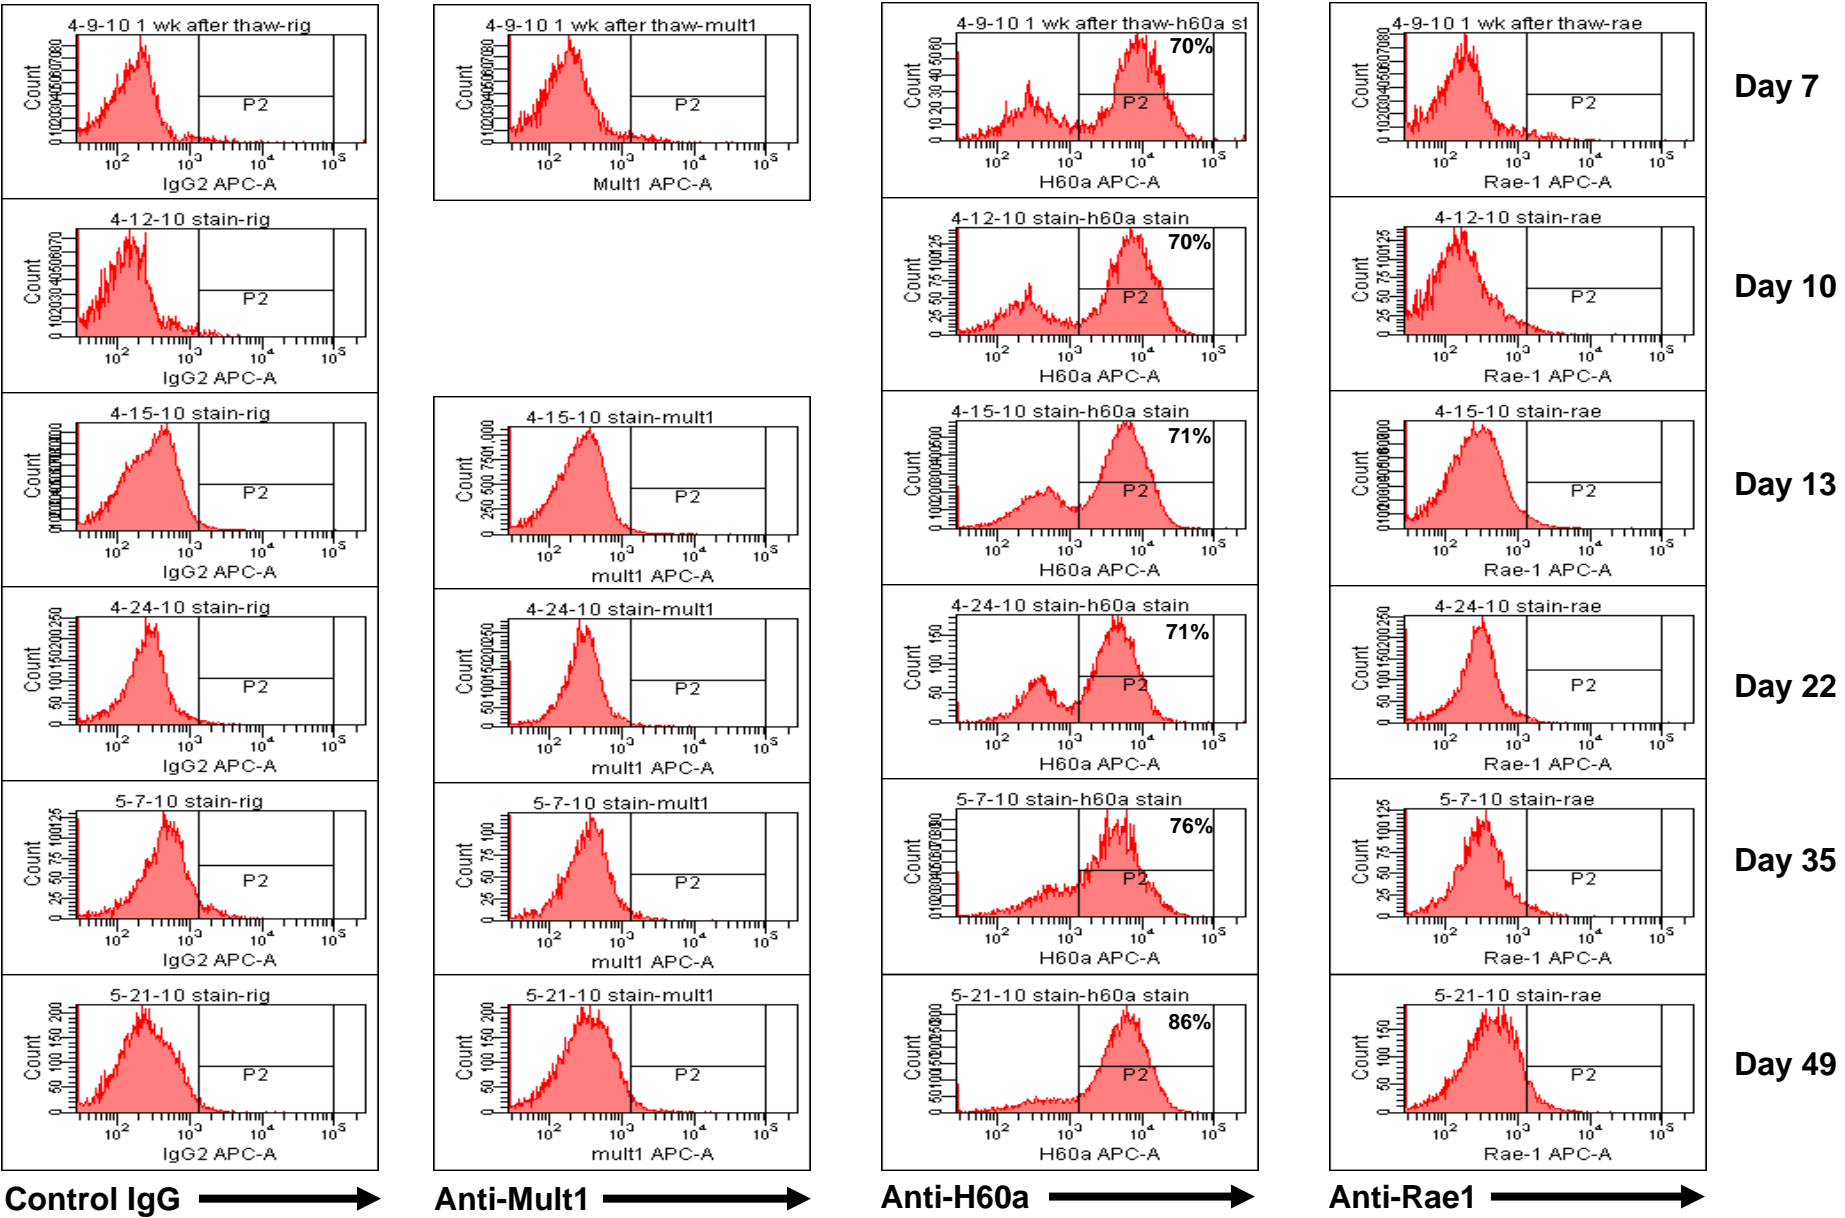

Control IgG → Anti-Mult1 → Anti-H60a → Anti-Rae1

Suppl Fig 1. Bimodal expression of H60a is stable for at least 22 days. The percentage H60a-high cells increases at late stages of in vitro culture.
