# Supplementary material
Source: PubMed Central journal article supplement (PMC3178735)
Supplement: NIHMS316617-supplement-3.pdf [file NIHMS316617-supplement-3.pdf]

## Supplementary Figure 3 O'Sullivan et al.,

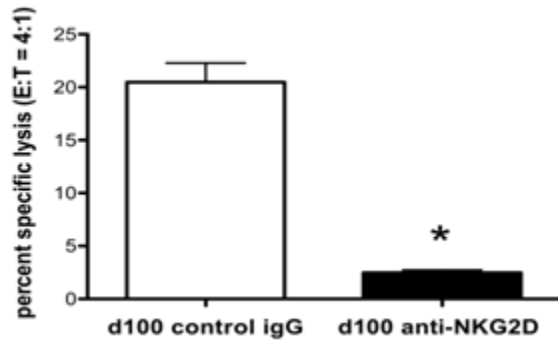

Suppl Fig 3. Lysis of d100 parental tumor cell line is inhibited by blocking NKG2D in activated NK cells. Day 7 IL-2 activated effector NK cells were used in a 4-hour  $^{51}\text{Cr}$  release assay using tumor target cells labeled with  $^{51}\text{Cr}$  as described (20) with either control IgG or anti-NKG2D (\* Indicates p value < 0.05 ).
