# Supplementary material
Source: PubMed Central journal article supplement (PMC3178735)
Supplement: NIHMS316617-supplement-4.pdf [file NIHMS316617-supplement-4.pdf]

# Supplementary Figure 4 O'Sullivan et al.,

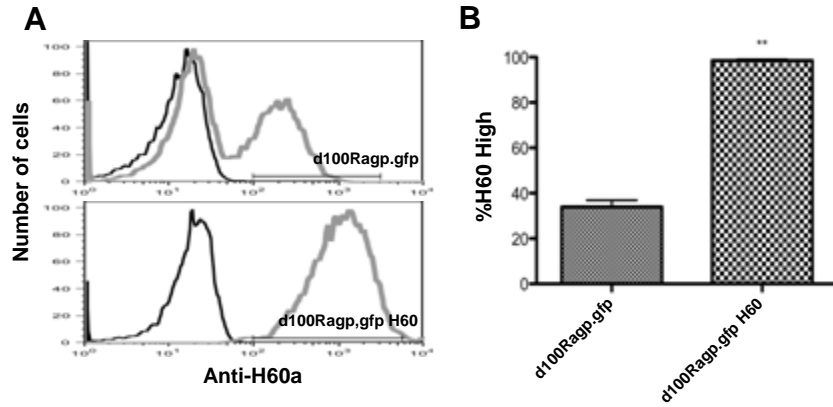

Suppl Fig 4. (A) Expression of H60a on the daughter cell lines generated from d100Ragp+PBS transduced with either gfp or H60a and gfp. (B) Quantification of H60a-hi cells from daughter cell lines (\*\* Indicates p value < 0.01 ).
