# Supplementary material
Source: PubMed Central journal article supplement (PMC3178735)

# Supplementary Figure 2 O'Sullivan et al.,

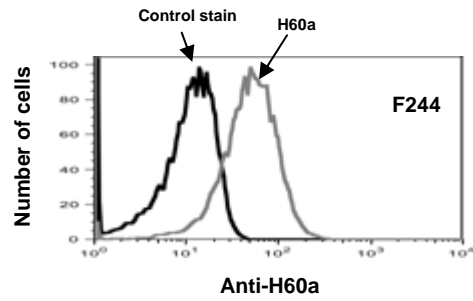

Suppl Fig 2. Expression of H60a on the progressor F244 cell line

Supplement: NIHMS316617-supplement-2.pdf [file NIHMS316617-supplement-2.pdf]
